# Supplementary material for: miR-23a Regulates Cardiomyocyte Apoptosis by Targeting Manganese Superoxide Dismutase
Source: PubMed Central journal article supplement — Mol Cells. 2017 Jul 31;40(8):542–9. doi: 10.14348/molcells.2017.0012 (PMC5582300; doi:10.14348/molcells.2017.0012), 2017-07-31
Supplement: molce-40-8-542-supple.pdf [file molce-40-8-542-supple.pdf]

Figure S1

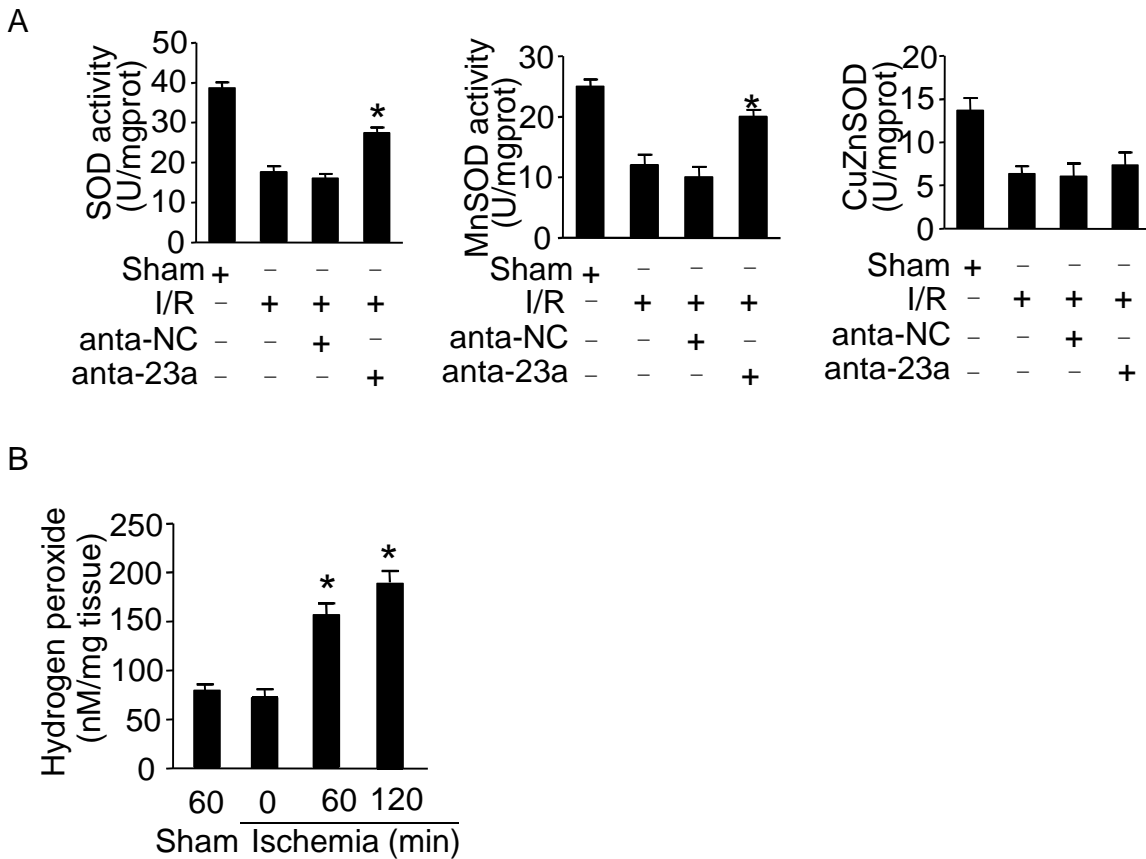

**Figure S1. The activity of total SOD, MnSOD, Cu/ZnSOD in I/R injured heart and the concentration of hydrogen peroxide in ischemic heart.** (A) Adult C57BL/6 mice received three consecutive days, intravenous injections of antagomir miR-23a (anta-23a) or antagomir negative control (anta-NC) at a dose of 30 mg/kg body weight. They were then subjected to ischemia for 45 minute and reperfusion for 3 hours. The activity of total SOD, MnSOD and CuZnSOD were detected and calculated. \*,  $P < 0.05$  versus I/R alone. (B) The levels of hydrogen peroxide upon myocardial ischemia. Mice were subjected to different period of ischemia and the concentration of hydrogen peroxide was assayed by Amplex red. \*,  $P < 0.05$  versus sham or 0 min group.
